# Supplementary material for: Aggregation-induced photocatalytic activity and efficient photocatalytic hydrogen evolution of amphiphilic rhodamines in water
Source: Royal Society of Chemistry journal article supplement (doi:10.1039/d0sc04285d), 2020-01-01
Supplement: d0sc04285d1.pdf [file d0sc04285d1.pdf]

## Supporting Information

### **Aggregation-induced photocatalytic activity and efficient photocatalytic hydrogen evolution of amphiphilic rhodamines in water**

Hajime Shigemitsu,<sup>a,b,c</sup> Youhei Tani,<sup>a</sup> Tomoe Tamemoto,<sup>a</sup> Tadashi Mori,<sup>a</sup> Xinxi Li,<sup>d</sup> Yasuko Osakada,<sup>d,e</sup> Mamoru Fujitsuka,<sup>d</sup> Toshiyuki Kida<sup>a</sup>

<sup>a</sup>Department of Applied Chemistry, Graduate School of Engineering, Osaka University, Suita 565-0871, Japan

<sup>b</sup>Frontier Research Base for Global Young Researchers, Graduate School of Engineering, Osaka University, Suita 565-0871, Japan

<sup>c</sup>Global Center for Medical Engineering and Informatics, Osaka University, Suita 565-0871, Japan

<sup>d</sup>Institute of Scientific and Industrial Research (SANKEN), Osaka University, Mihogaoka 8-1, Ibaraki, Osaka 567-0047, Japan

<sup>e</sup>Institute for Advanced Co-creation Studies, Osaka University, 1-1 Yamadagaoka, Suita, Osaka, 565-0871, Japan

### **Table of contents**

|                                        |    |
|----------------------------------------|----|
| 1. Materials, Instruments, and Methods | S2 |
| 2. Synthetic Methods                   | S5 |
| 3. Supplementary Figures               | S7 |

## 1. Materials, Instruments, and Methods

### Materials and Instruments

Unless stated otherwise, all commercial reagents were used as received. **RhB-C18** and **Rh19-C2** were purchased from Tokyo Chemical Industry (TCI) (**RhB-C18**: Octadecyl rhodamine B chloride (counter anion: chloride ion, product number: O0512), **Rh19-C2**: Rhodamine 6G (counter anion: chloride ion, product number: R0039)). Water was purified using a Milli-Q water system (Direct-Q 3UV, Millipore).  $^1\text{H}$  and  $^{13}\text{C}$  NMR spectra were recorded on a JEOL JNM-ESC400. Data are reported as follows: chemical shifts in ppm using the residual solvent peak ( $\text{CD}_3\text{OD}$ : 3.31 ppm) as an internal standard, integration, multiplicity (s = singlet, d = doublet, t = triplet, m = multiplet, br = broadened), and coupling constants (Hz). High-resolution mass spectra were recorded on a JEOL JMS-700. UV-vis absorption and photoluminescence spectra were recorded on a JASCO V-660 and JASCO FP-8500, respectively. Dynamic light scattering (DLS) measurements were conducted by Malvern Panalytical Zetasizer Nano ZS. For TEM analysis, samples were deposited onto formvar support film-coated Cu grids that were subjected to hydrophilic treatment for 60 s using a JEOL HDT-400 device. To examine the photocatalytic activities of the samples toward **HITCI** (Sigma-Aldrich, product number: 252034-100MG) and for ESR spectroscopy experiments, the samples were irradiated with an ASAHI SPECTRA MAX-301 Xe light source (300 W) with a light band-pass filter (560 nm (FWHM: 10 nm)). Electron spin resonance (ESR) spectroscopy was performed using 4-OH-TEMP (TCI, product number: T0910) and DMPO (TCI, product number: D2362) as spin-trapping reagents for the detection of singlet oxygen and hydroxyl radical species, respectively, on a BRUKER EMXmicro spectrometer. Cyclic voltammetry and square wave voltammetry were performed on an electrochemical workstation (ALS600B, BAS) using a conventional three-electrode configuration. The device includes a diamond working electrode, a Pt wire counter electrode, and a Ag/AgCl reference electrode. The electrolyte was an argon-purged water solution containing 0.1 M KCl. The amount of generated  $\text{H}_2$  was detected using a gas chromatograph equipped with a TCD detector (GC-8A, Shimadzu, Kyoto, Japan). For the photocatalytic hydrogen evolution experiments, irradiation was performed with a ASAHI SPECTRA HAL-320W Xe lamp (300 W) with a light cut-off filter (<360 nm).

### UV-vis and PL spectroscopies

The solution state UV-vis absorption and photoluminescence spectra were measured on a V-660 spectrometer (JASCO, Tokyo, Japan) and FP-8500 fluorescence spectrometer (JASCO, Tokyo, Japan) using  $1.0 \times 1.0 \text{ cm}^2$  or  $0.2 \times 1.0 \text{ cm}^2$  cuvette, respectively. The samples were prepared by diluting a 10 mM DMSO stock solution with DMSO or water. The DMSO contents of all the samples were kept below 0.1 vol% without the experiments using DMSO as a solvent. The spectra were recorded within 3 h of sample preparation at room temperature. The excitation wavelengths used in PL spectroscopy are mentioned in the figure captions.

### Dynamic light scattering (DLS) experiments

The sample solutions used for DLS measurements were prepared by the same method as that used for preparing the samples for UV-vis and PL spectroscopies. The sample solutions were then filtered through a PTFE membrane filter (pore size: 200 nm, ADVANTEC DISMIC-25JP) to remove contaminants that may hinder DLS measurements. The samples were poured into plastic cuvettes and DLS measurements were made at room temperature at a scattering angle of 90° and a laser wavelength of 633 nm.

### Transmission electron microscopy (TEM) observations

The hydrophilic treatment of the formvar support films coated Cu grid (Cu 200 mesh covered with a formvar membrane, JEOL) were performed by JEOL HDT-400 for 60 sec. The sample solutions (50  $\mu$ M, 5.0  $\mu$ L) were dropped on the hydrophilic treated formvar membrane coated Cu grid. The samples were dried at room temperature for 10 min and then in *vacuo* over 12 h. The obtained samples are observed by JEOL ARM200F at an accelerator potential of 200 kV.

### Examination of photocatalytic activity of rhodamine derivatives toward HITCI

A HITCI DMSO stock solution (500  $\mu$ M, 3.0  $\mu$ L) was added to the prepared sample solutions (3.0 mL) in  $1.0 \times 1.0$  cm<sup>2</sup> cuvettes. The solution mixtures were then irradiated using a Xe lamp with a band-pass filter (560 nm (FWHM: 10 nm)) with continuous stirring to initiate the photoreaction. To monitor the course of the reaction, UV-vis spectra were recorded every 1 min for 5 min.

### ESR experiments using spin trap reagents

The prepared sample solutions ([RhB-C2] = [RhB-C18] = [Rh19-C2] = [Rh19-C18] = 50  $\mu$ M, [4-OH-TEMP] = [DMPO] = 100 mM) were poured into quartz capillary tubes ( $\phi$ : 2 mm, kk-agri) and irradiated with a Xe lamp with a band-pass filter (560 nm (FWHM: 10 nm)) (singlet oxygen detection (4-OH-TEMP); 3 min, hydroxy radical detection (DMPO): 10 min). The distance between the sample and the light source was 2.0 cm. Immediately after photoirradiation, the ESR spectra were recorded with a center field of 3415 G, sweep width of 100 G, and microwave power of 1.0 mW at room temperature.

### Redox potential

Cyclic voltammetry and square wave voltammetry were performed using a three-electrode setup in a 0.1 M KCl aqueous solution ([Rhodamine derivatives] = 100  $\mu$ M) in the potential range of 0.2–1.2 V at 50 mV/s using a diamond working electrode (HOKUTO DENKO, HX-W7), a platinum wire counter electrode, and a Ag/AgCl reference electrode. The HOMO levels were estimated by converting the observed peak potential to standard calomel electrode (SCE) by subtracting 0.042 V,

and then subtracting the potential from  $-4.44$  eV. The LUMO was estimated by converting the absorption edge wavelength to optical band gap energy (eV) and adding the value to the calculated HOMO level.

### Hydrogen evolution experiments

A test tube was charged with an aqueous solution of the supramolecular photocatalysts or monomers of rhodamine (50 or 100  $\mu\text{M}$ ), an aqueous solution of ascorbic acid (500 mM), and hexachloroplatinic acid (50  $\mu\text{M}$ ) as a Pt nanoparticle precursor, and the resulting solution was kept at room temperature for 15 min. The test tube was sealed with a W-18 rubber cap (Sansho, Osaka, Japan) and the mixture was degassed by bubbling argon for 30 min. The solution was then irradiated with a Xe light source (300 W) for 80 min. Subsequently, gas samples were taken with a gas-tight syringe and analyzed using a gas chromatograph equipped with a TCD detector (GC-8A, Shimadzu, Kyoto, Japan). The column temperature was 100  $^{\circ}\text{C}$ , the detector current was 60 mA, the primary pressure was 600 kPa, and the carrier gas pressure was 300 kPa. A calibration curve was constructed using  $\text{H}_2$  standard gas (1020–11201, GL science) to determine the amount of  $\text{H}_2$ . The apparent quantum efficiency (AQE) for the photocatalytic  $\text{H}_2$  evolution was measured using a longpass filter (525 nm). The AQE were estimated using the equation below:

$$\text{AQE (\%)} = \frac{2 \times \text{the number of evolved hydrogen molecules}}{\text{the number of incident photons}} \times 100$$

## 2. Synthetic Methods

### Synthesis of RhB-C2

Aqueous cesium carbonate (2 *N*, 1.0 mL) was added to a methanolic solution (6.0 mL) of rhodamine B (240 mg, 0.53 mmol), and the solution mixture was boiled, cooled to 4 °C, and maintained at this temperature for 12 h. The generated precipitate was filtered, washed with cold methanol, and dried under vacuum at 60 °C to obtain a Cs salt of rhodamine B as a dark violet solid (238 mg, 0.435 mmol, 82%). This material was used in the next step without further purification.

A mixture of Cs-salt of rhodamine B (70 mg, 0.13 mmol) and 1-iodoethane (47  $\mu$ L, 0.192 mmol) in DMF (1.5 mL) was stirred at 60 °C for 19 h. The solvent was removed under reduced pressure, and the residue was purified by column chromatography on silica gel with a mixture of chloroform: methanol (9:1, v/v) as eluent to afford **RhB-C2** (counter anion: iodide ion) as a dark purple solid (70 mg, 0.12 mmol, 94 %).

$^1\text{H}$  NMR (400 MHz,  $\text{CD}_3\text{OD}$ , rt):  $\delta$  (ppm) = 8.31 (dd,  $J$  = 7.6, 1.2 Hz, 1H), 7.84 (m, 2H), 7.44 (dd,  $J$  = 7.6, 1.2 Hz, 1H), 7.13 (d,  $J$  = 9.2 Hz, 2H), 7.04 (dd,  $J$  = 9.2, 2.4 Hz, 2H), 6.99 (d,  $J$  = 2.4 Hz, 2H), 4.02 (q,  $J$  = 7.2 Hz, 2H), 3.67 (q,  $J$  = 7.2 Hz, 8H), 1.31 (t,  $J$  = 7.2 Hz, 12H), 0.98 (t,  $J$  = 7.2 Hz, 3H).  $^{13}\text{C}$  NMR (400 MHz,  $\text{CD}_3\text{OD}$ , rt):  $\delta$  (ppm) = 166.6, 160.3, 159.3, 157.2, 134.0, 132.4, 132.2, 131.6, 131.5, 115.5, 114.8, 97.2, 62.5, 46.8, 14.0, 12.8. HR-MS (FAB): Calcd. for  $[\text{M}+\text{H}]^+$ :  $m/z$  = 471.2642; Found: 471.2655.

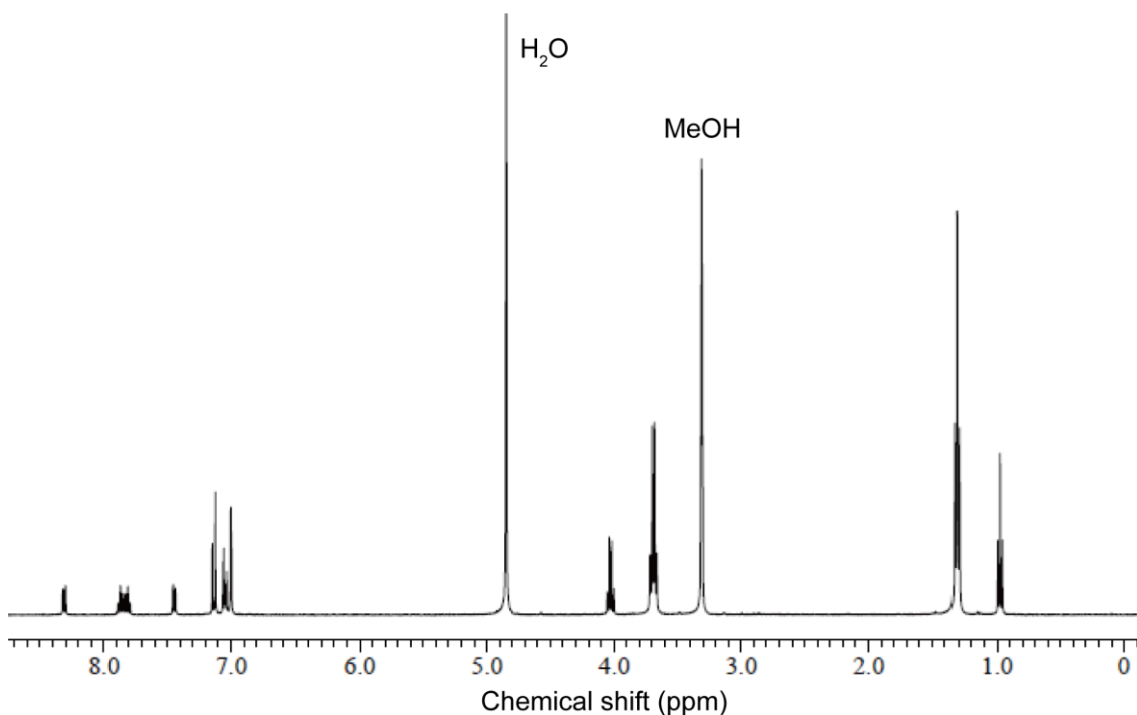

$^1\text{H}$  NMR spectrum of **RhB-C2** (400 MHz,  $\text{CD}_3\text{OD}$ , rt).

### Synthesis of Rh19-C18

An aqueous solution of cesium carbonate (2 N, 1.0 mL) was added to a methanolic solution (6.0 mL) of rhodamine 19 perchlorate (514 mg, 1.00 mmol), and the solution mixture was boiled, cooled to 4 °C, and maintained at this temperature for 12 h. The generated precipitate was filtered, washed with cold methanol, and dried under reduced pressure at 60 °C to obtain a Cs salt of rhodamine 19 as a dark violet solid (602 mg, 0.93 mmol, 93%). This material was used in the next step without further purification.

A mixture of Cs-salt of rhodamine 19 (300 mg, 0.55 mmol) and 1-bromooctadecane (367 mg, 1.10 mmol) in DMF (10 mL) was stirred at 60 °C for 19 h. The solvent was removed under reduced pressure, and the residue was purified by column chromatography on silica gel with a mixture of chloroform: methanol (9:1, v/v) as eluent to afford **Rh19-C18** (counter anion: bromide ion) as a dark purple solid (117 mg, 0.18 mmol, 32 %).

$^1\text{H}$  NMR (400 MHz,  $\text{CD}_3\text{OD}$ , rt):  $\delta$  (ppm) = 8.31 (d,  $J$  = 7.6, 1.2 Hz, 1H), 7.84 (m, 2H), 7.41 (dd,  $J$  = 7.6, 1.2 Hz, 1H), 6.96 (s, 2H), 6.90 (d,  $J$  = 1.2 Hz, 2H), 3.91 (t,  $J$  = 6.4 Hz, 2H), 3.56 (q,  $J$  = 7.2 Hz, 4H), 2.14 (s, 6H), 1.38 (t,  $J$  = 7.2 Hz, 6H), 1.01–1.33 (m, 30H), 0.82–0.93 (m, 5H).  $^{13}\text{C}$  NMR (400 MHz,  $\text{CD}_3\text{OD}$ , rt):  $\delta$  (ppm) = 167.2, 159.6, 159.2, 158.0, 135.0, 134.2, 132.5, 132.2, 131.8, 131.7, 130.3, 127.2, 115.0, 95.1, 66.9, 39.7, 33.3, 31.0, 30.7, 30.5, 29.6, 27.2, 23.9, 17.8, 14.6, 14.3. HR-MS (FAB): Calcd. for  $[\text{M}+\text{H}]^+$ :  $m/z$  = 667.4833; Found: 667.4835.

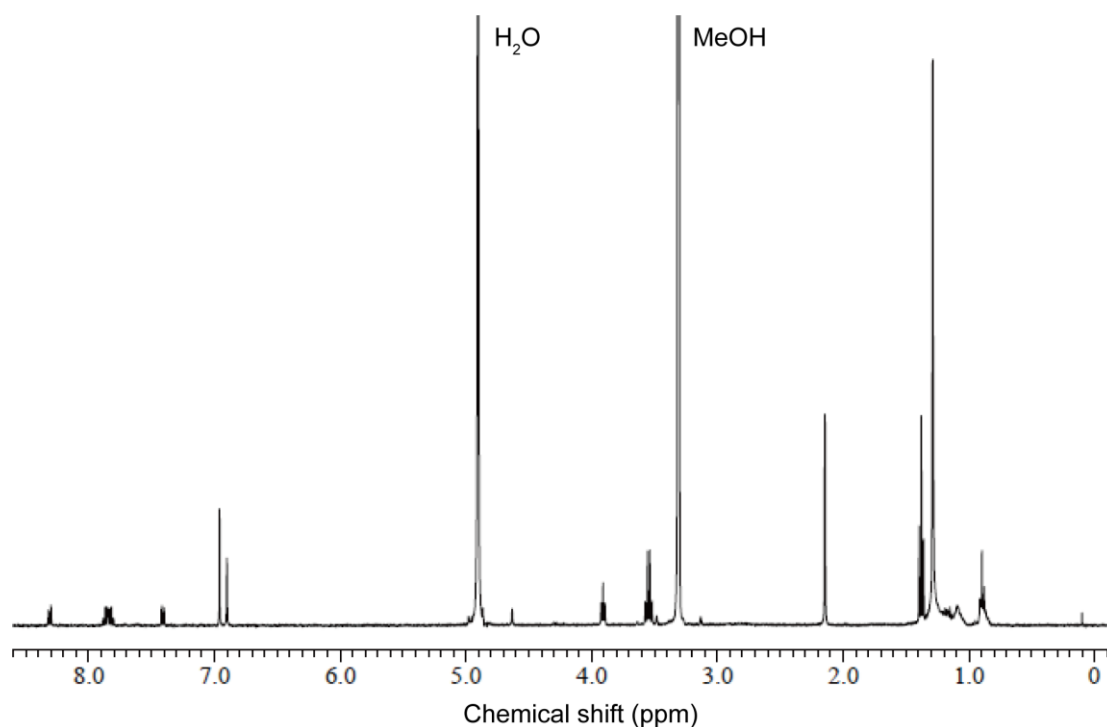

$^1\text{H}$  NMR spectrum of **Rh19-C18** (400 MHz,  $\text{CD}_3\text{OD}$ , rt).

### 3. Supplementary Figures

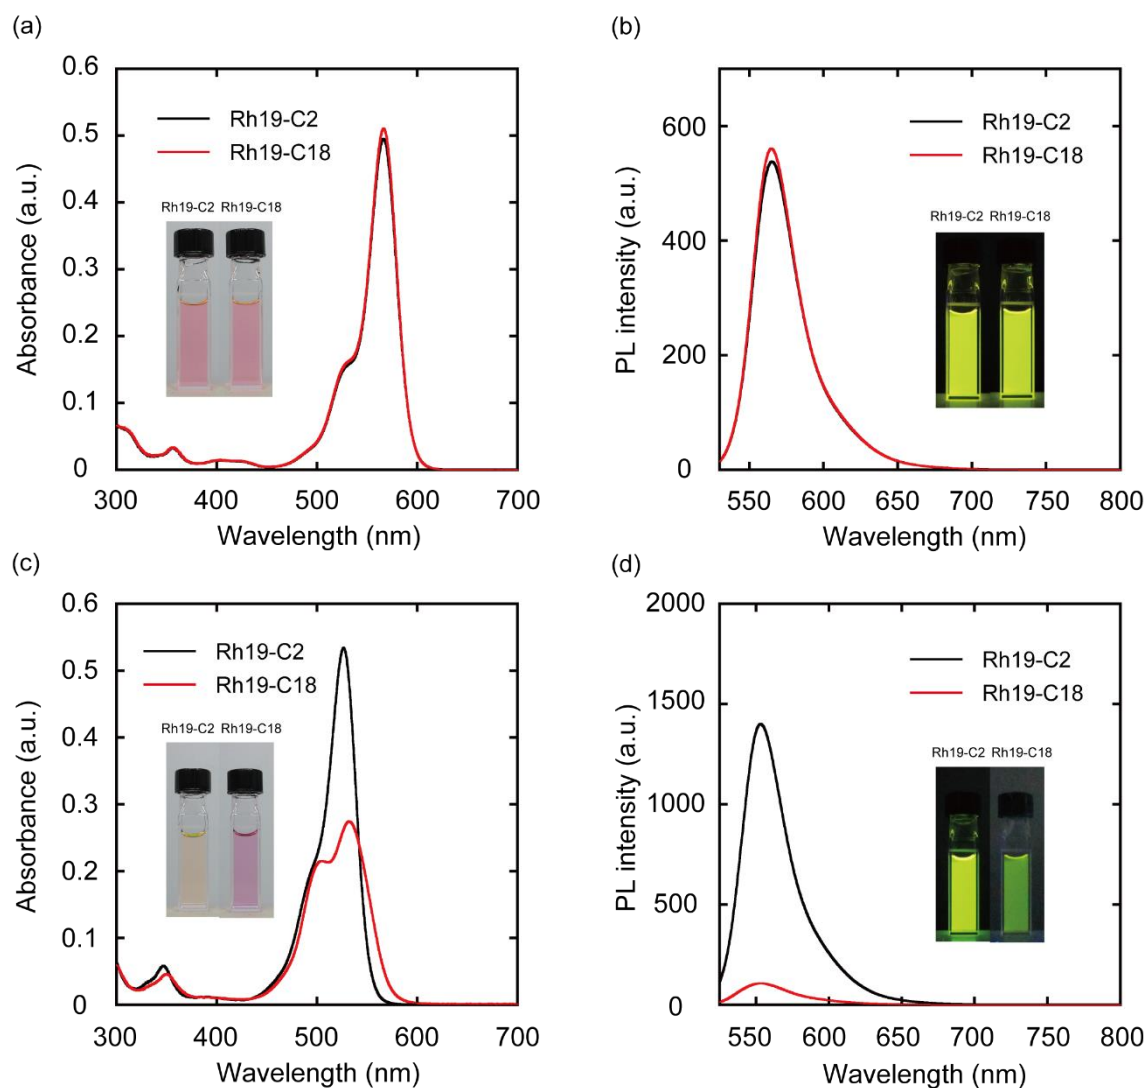

**Figure S1.** (a,c) UV-vis absorption and (b,d) PL spectra of **Rh19-C2** and **Rh19-C18** in (a,b) DMSO and (c,d) water. Experimental conditions:  $[\text{Rh19-C2}] = [\text{Rh19-C18}] = 5.0 \mu\text{M}$ , rt, water, excitation wavelength: 520 nm. Insets: Optical photos of **Rh19-C2** and **Rh19-C18** in DMSO and water under (a,c) daylight and (b,d) UV light (365 nm).

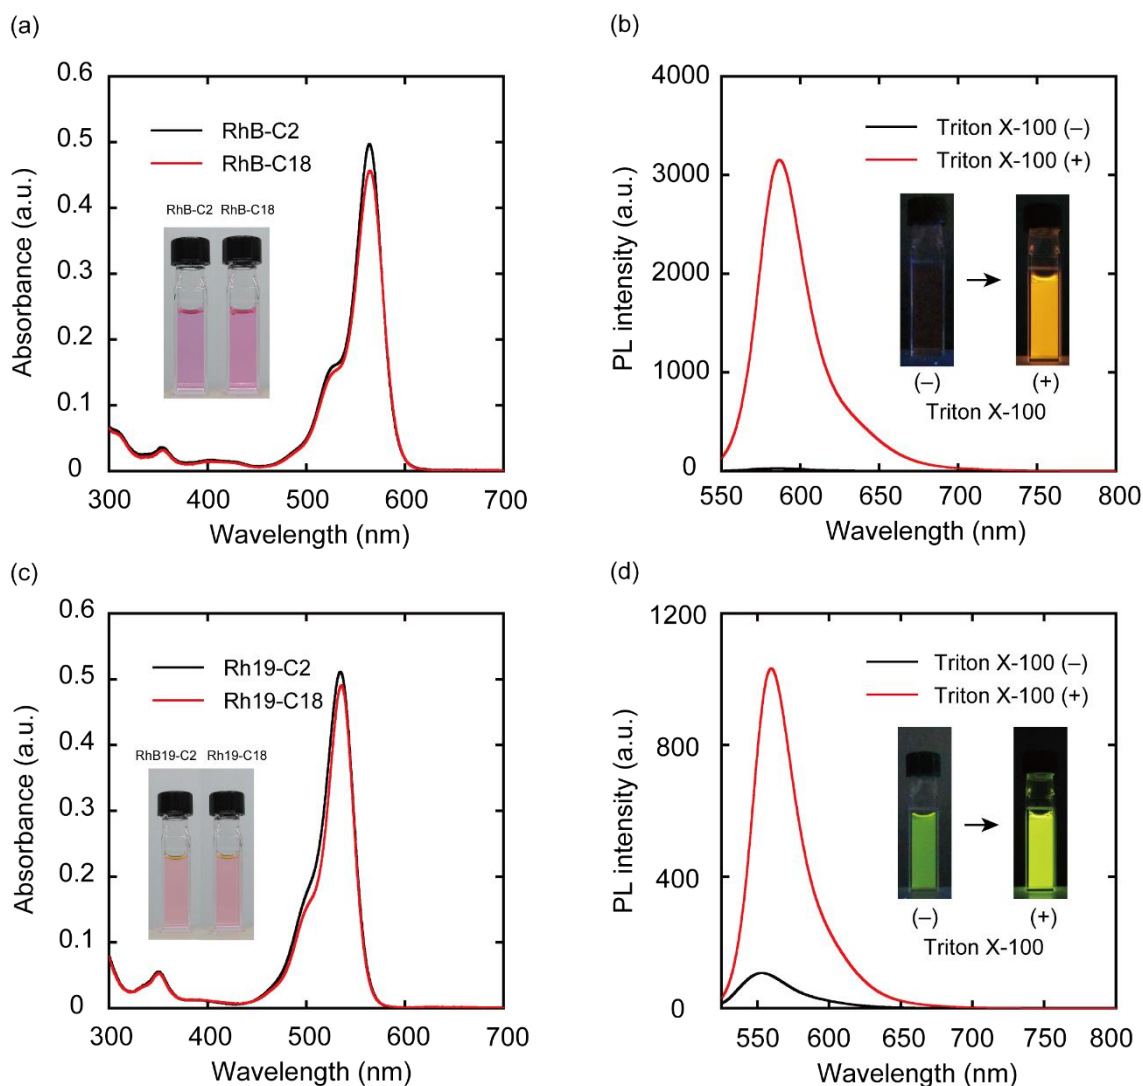

**Figure S2.** (a,c) UV-vis spectra of (a) **RhB-C2/RhB-C18** and (c) **Rh19-C2/Rh19-C18** in the presence of Triton X-100. (b,d) PL spectra of (b) **RhB-C18** and (d) **Rh19-C18** in water with or without Triton X-100. Experimental conditions:  $[\text{RhB-C2}] = [\text{RhB-C18}] = [\text{Rh19-C2}] = [\text{Rh19-C18}] = 5.0 \mu\text{M}$ ,  $[\text{Triton X-100}] = 0.3 \text{ vol\%}$ , rt, water, excitation wavelength: 540 (**RhB**) and 520 (**Rh19**) nm. Insets: Optical photos of (a,c) **RhB-C2/RhB-C18** and **Rh19-C2/Rh19-C18** in water under daylight, and (b,d) **RhB-C18** and **Rh19-C18** with or without Triton X-100 in water under UV light (365 nm).



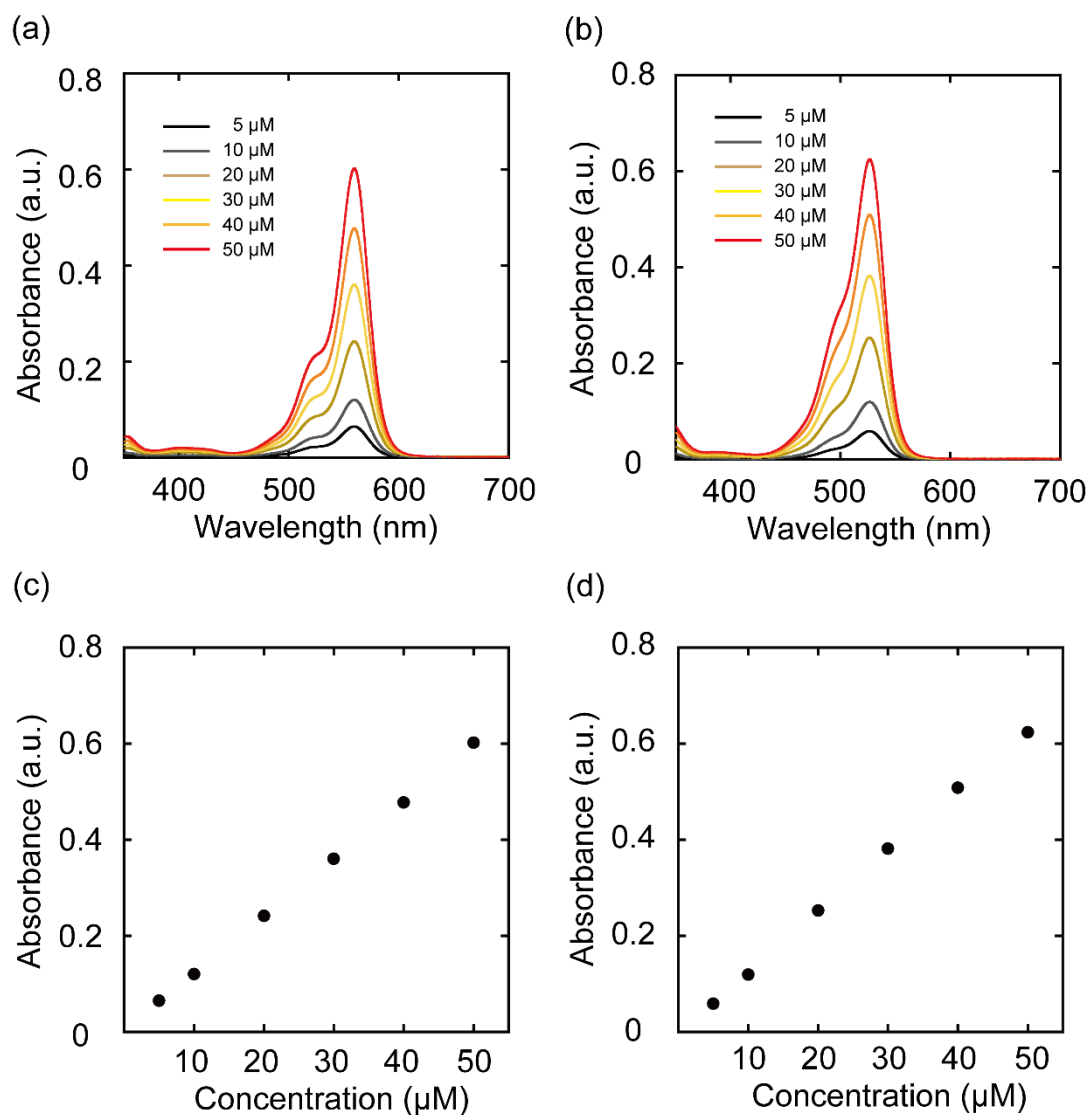

**Figure S3.** (a,b) Concentration-dependent UV-vis spectra of (a) **RhB-C2** and (b) **Rh19-C2**. (c,d) Variation in absorbance with rhodamine concentration: (c) **RhB-C2**, and (d) **Rh19-C2**. Experimental conditions:  $[\text{RhB-C2}] = [\text{Rh19-C2}] = 5.0\text{--}50\text{ }\mu\text{M}$ , rt, water. Optical path length: 0.2 mm.

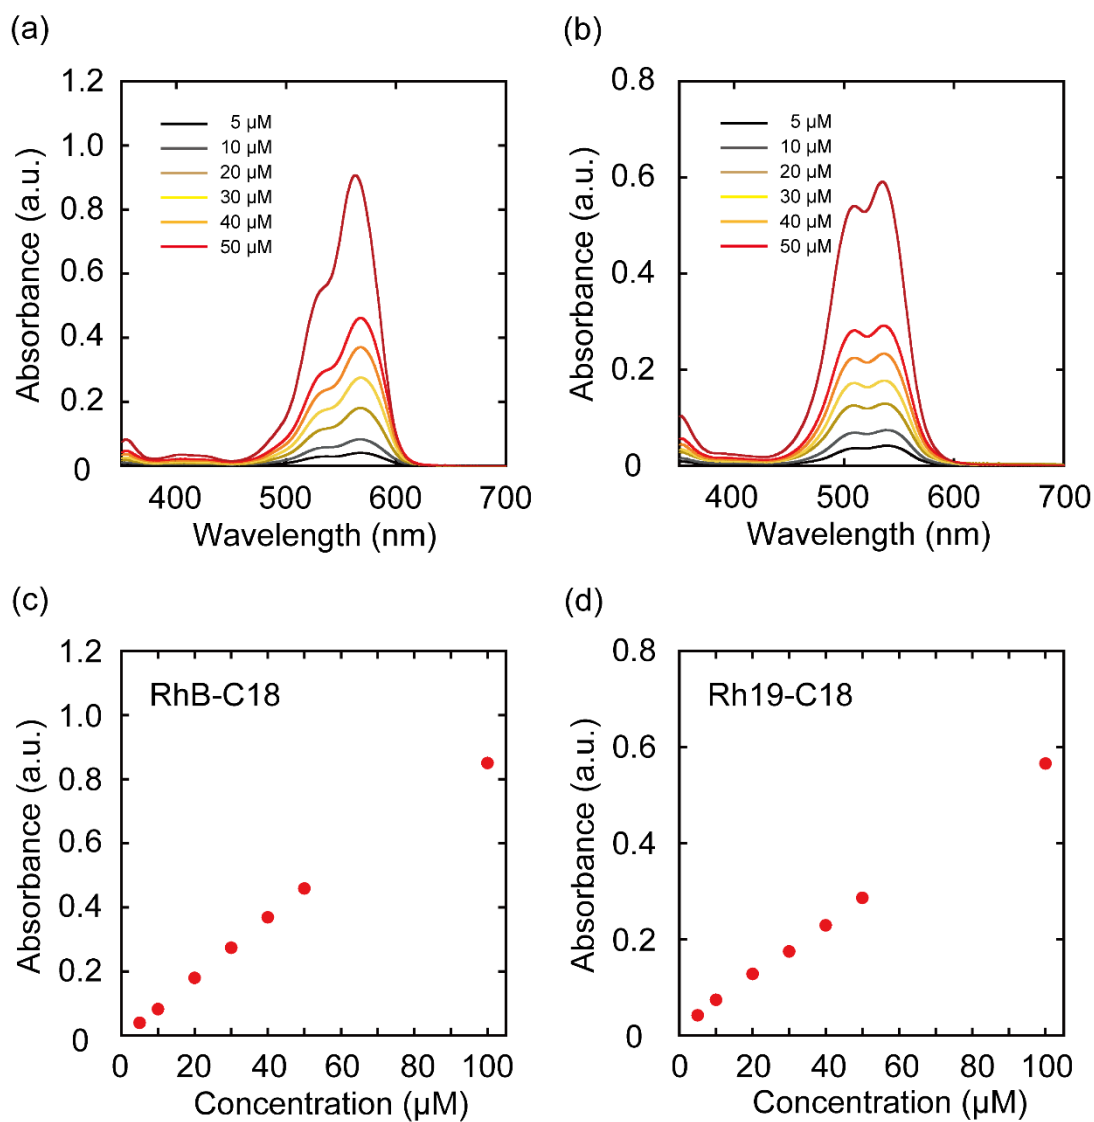

**Figure S4.** (a,b) Concentration-dependent UV-vis spectra of (a) **RhB-C18** and (b) **Rh19-C18**. (c,d) Variation in absorbance with rhodamine concentration: (c) **RhB-C18**, and (d) **Rh19-C18**. Experimental conditions:  $[\text{RhB-C18}] = [\text{Rh19-C18}] = 5.0\text{--}100\text{ }\mu\text{M}$ , rt, water. Optical path length: 0.2 mm.

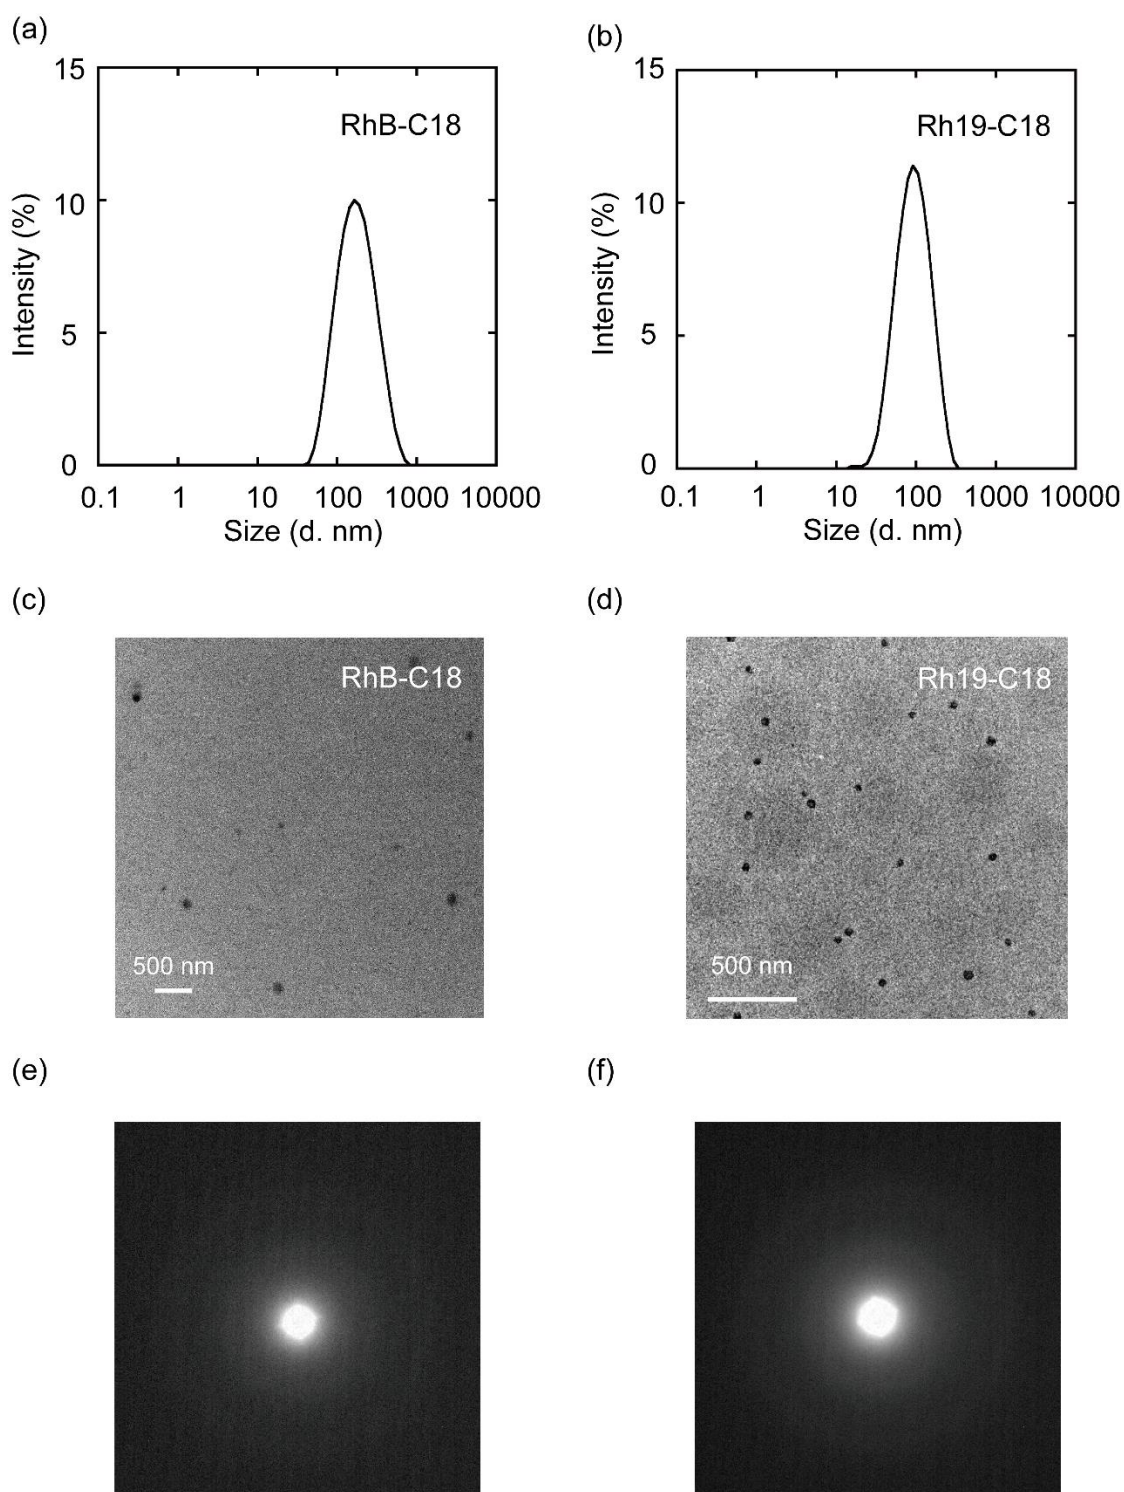

**Figure S5.** (a,b) Size distributions of supramolecular assemblies of (a) **RhB-C18** and (b) **Rh19-C18** determined by DLS (average particle size: (a) 200 nm, (b) 82 nm, Polydispersity index (PDI): (a) 0.410, (b) 0.182). (c,d) TEM images of supramolecular assemblies of (c) **RhB-C18** and (d) **Rh19-C18**. Scale bar: 500 nm. (e,f) SAED diffraction patterns of supramolecular assemblies of (e) **RhB-C18** and (f) **Rh19-C18**. Experimental conditions:  $[\text{RhB-C18}] = [\text{Rh19-C18}] = 50 \mu\text{M}$ , rt, water.

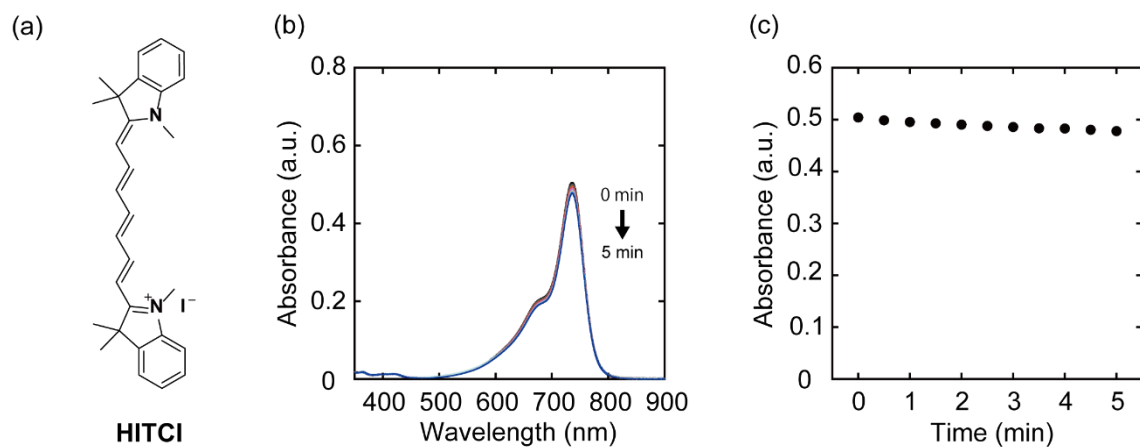

**Figure S6.** (a) Chemical structure 1,1',3,3,3',3'-hexamethylindotricarbocyanine iodide (**HITCI**). (b) UV-vis absorption spectra of **HITCI** after photoirradiation. (c) Time-course of absorbance at 735 nm after photoirradiation. Experimental conditions: [**HITCI**] = 2.5  $\mu$ M solvent: water, rt, irradiation wavelength: 560 nm (FWHM: 10 nm, Xe lamp, 300 W).

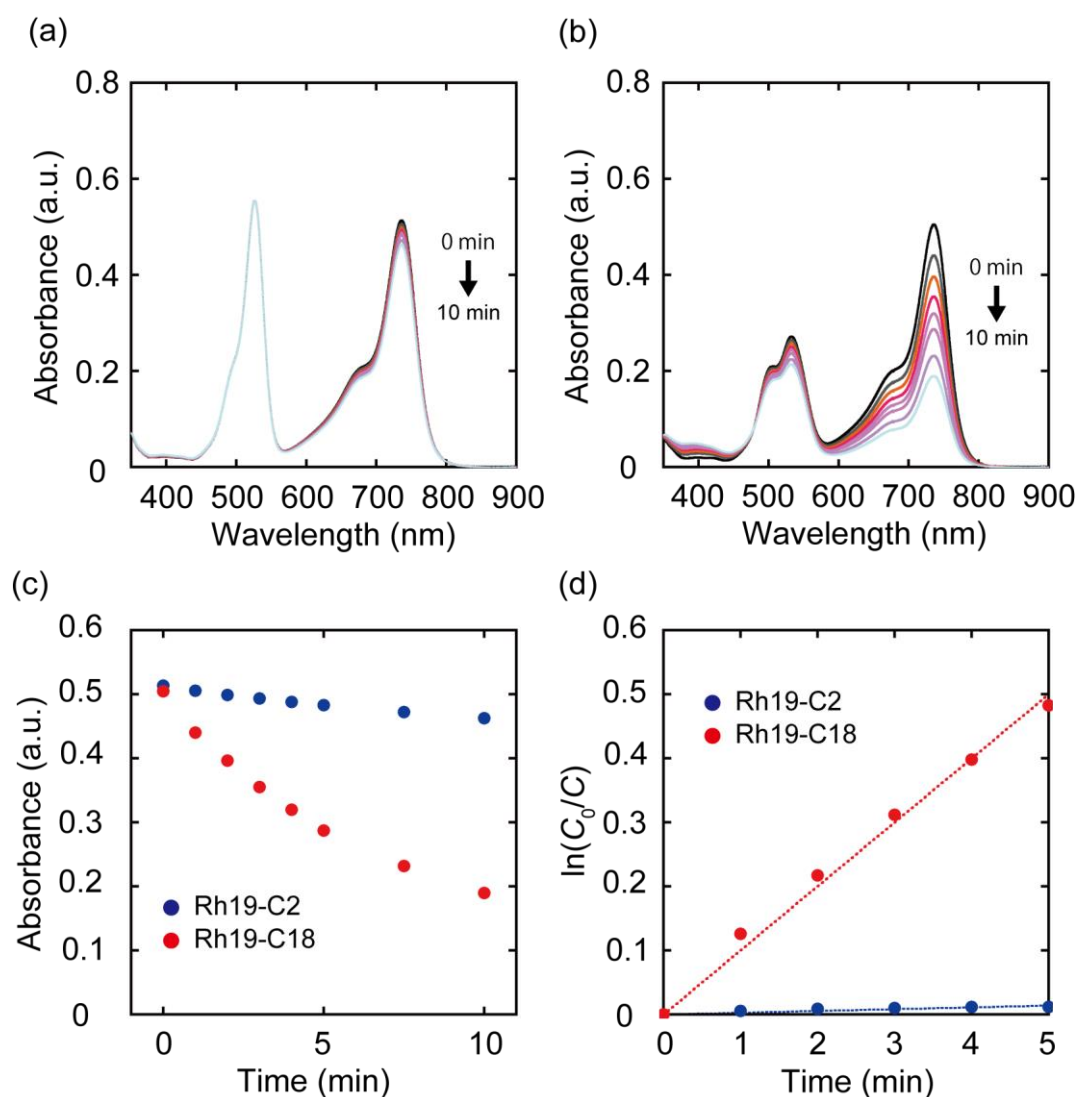

**Figure S7.** (a,b) UV-vis absorption spectra of mixture of **HITCI** with (a) **Rh19-C2** and (b) **Rh19-C18** after photoirradiation. (c) Time-course of absorbance at 735 nm after photoirradiation of samples containing **Rh19-C2** (blue circle) and **Rh19-C18** (red circle). (d) Linear regression plots of **HITCT** absorbance with **RhB-C2** (blue circle) and **RhB-C18** (red circle). Experimental conditions:  $[\text{RhB-C2}] = [\text{RhB-C18}] = 5.0 \mu\text{M}$ ,  $[\text{HITCI}] = 2.5 \mu\text{M}$  solvent: water, rt, irradiation wavelength: 560 nm (FWHM: 10 nm, Xe lamp, 300 W).

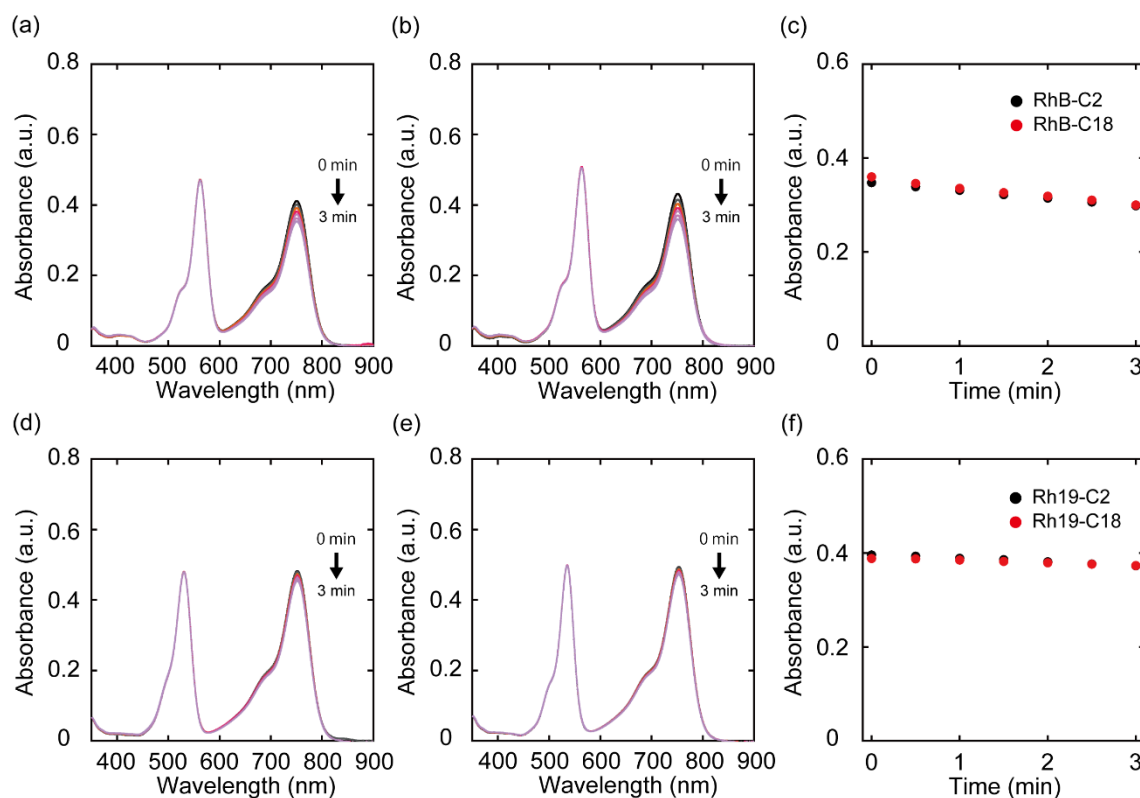

**Figure S8.** (a,b,d,e) UV-vis absorption spectra of mixtures of **HITCI** with (a) **RhB-C2**, (b) **RhB-C18**, (d) **Rh19-C2**, and (e) **Rh19-C18** in the presence of Triton X-100. (c,f) Time-course of absorbance at 735 nm after photoirradiation of a mixture of **HITCI** with (c) **RhB-C2/RhB-C18** and (f) **Rh19-C2/Rh19-C18** in the presence of Triton X-100.

(a) Electron transfer

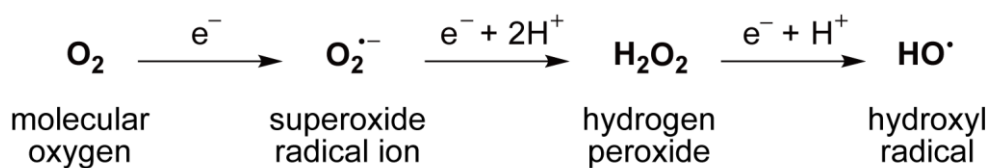

(b) Energy transfer

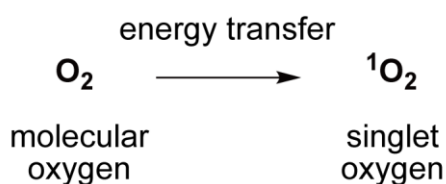

**Figure S9.** Formation of reactive oxygen species (ROS) through (a) electron- and (b) energy-transfer processes.

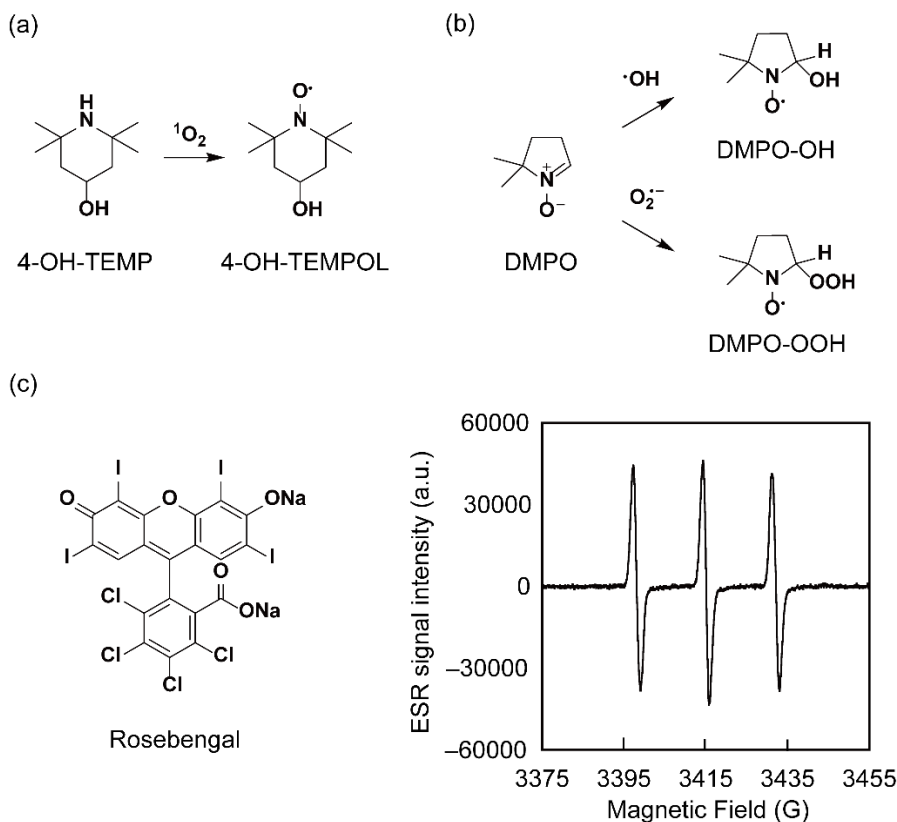

**Figure S10.** (a,b) Chemical structures of (a) 4-OH-TEMP and (b) DMPO, and the reactions with ROS. (c) Chemical structure of Rose Bengal and ESR spectrum of TEMPOL radical generated by the photoirradiation of Rose Bengal. Experimental conditions: [Rose Bengal] = 50  $\mu\text{M}$ , [4-OH-TEMP] = 100 mM, solvent: water, rt, irradiation wavelength: 560 nm (FWHM: 10 nm, Xe lamp, 300 W, 3 min).

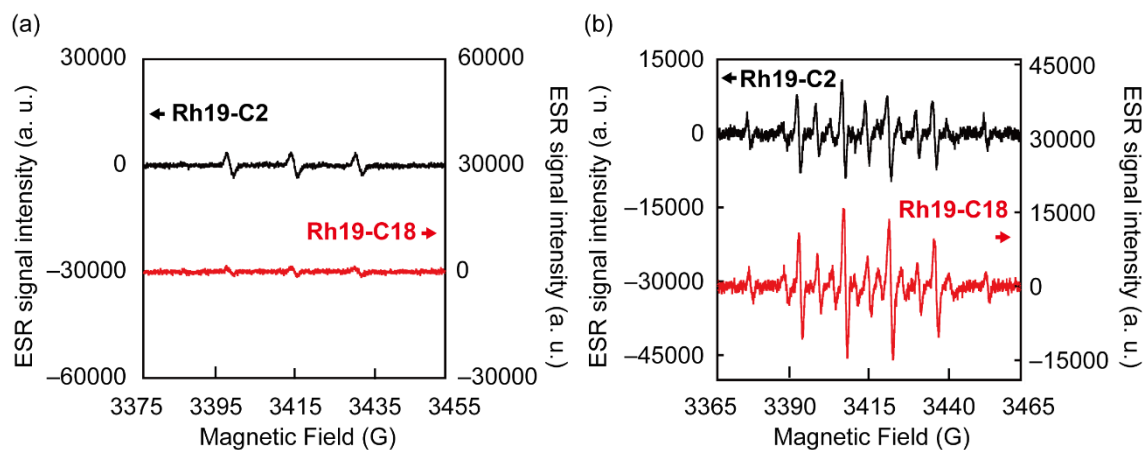

**Figure S11.** ESR signals of (a) TEMPOL and (b) DMPO adducts observed for the samples mixed with **Rh19-C2** and **Rh19-C18** after light irradiation. Experimental conditions:  $[\text{Rh19-C2}] = [\text{Rh19-C18}] = 50 \mu\text{M}$ ,  $[\text{4-OH-TEMP}] = [\text{DMPO}] = 100 \text{ mM}$ , solvent: water, rt, irradiation wavelength: 560 nm (FWHM: 10 nm, Xe lamp, 300 W, 3 or 10 min).



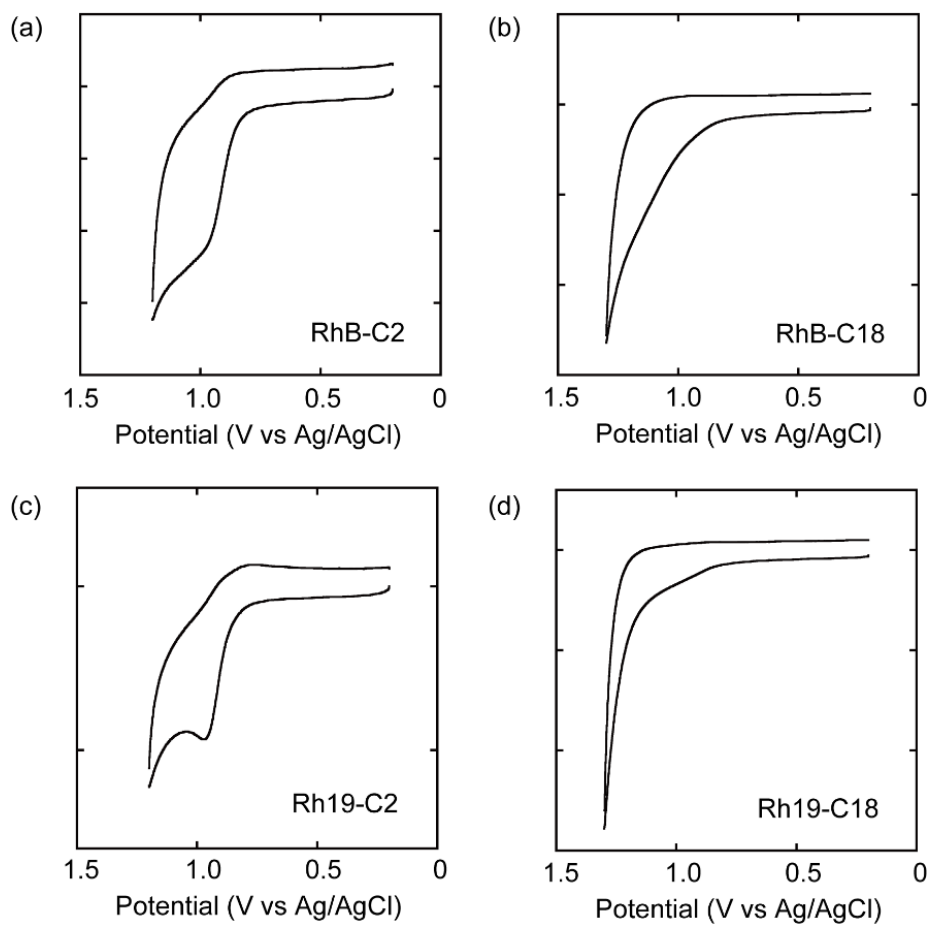

**Figure S12.** Cyclic voltammograms of (a) **RhB-C2**, (b) **RhB-C18**, (c) **Rh19-C2**, and (d) **Rh19-C18**.

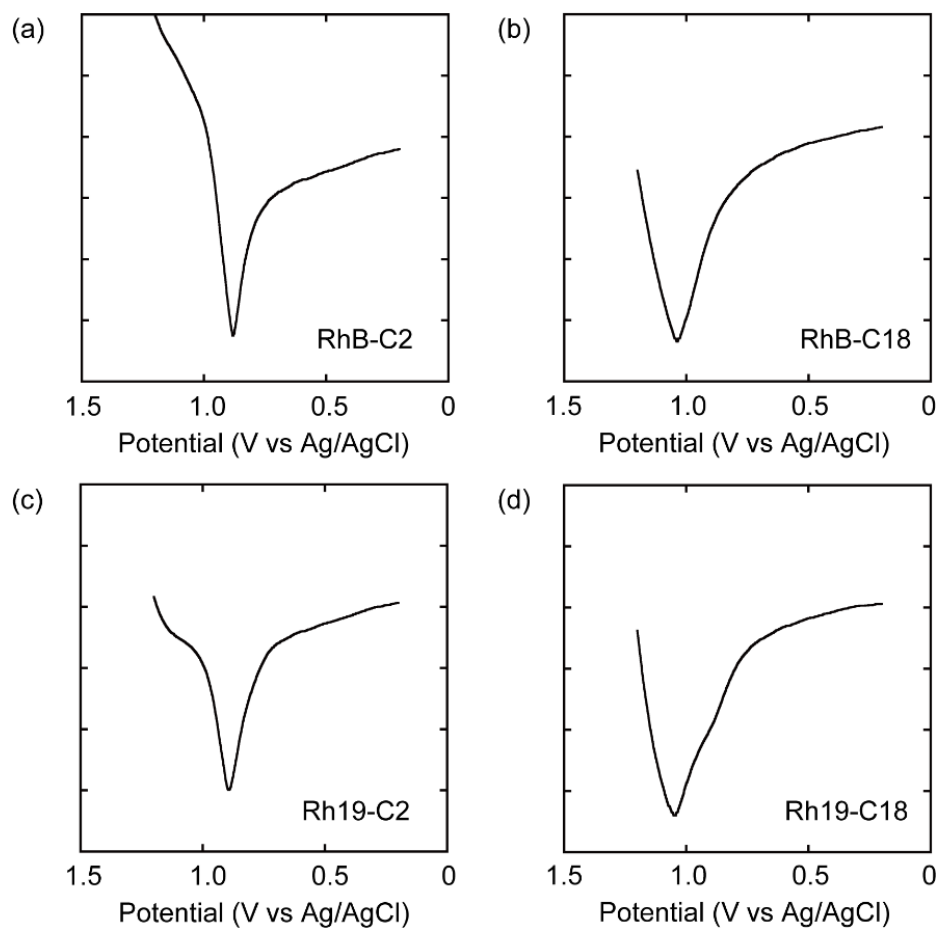

**Figure S13.** Squarewave voltammograms of (a) **RhB-C2**, (b) **RhB-C18**, (c) **Rh19-C2**, and (d) **Rh19-C18**.

**Table S1.** Optical and electrochemical properties of rhodamine derivatives.

| Compound        | Ox. Potential<br>(V vs. SCE) | $\lambda_{\text{abs}}$ onset<br>(nm) | $E_{0-0}$<br>(eV) | HOMO<br>(eV) | LUMO<br>(eV) |
|-----------------|------------------------------|--------------------------------------|-------------------|--------------|--------------|
| <b>RhB-C2</b>   | 0.92                         | 585                                  | 2.12              | −5.36        | −3.24        |
| <b>RhB-C18</b>  | 1.08                         | 601                                  | 2.06              | −5.52        | −3.46        |
| <b>Rh19-C2</b>  | 0.93                         | 552                                  | 2.25              | −5.37        | −3.12        |
| <b>Rh19-C18</b> | 1.09                         | 571                                  | 2.17              | −5.53        | −3.36        |

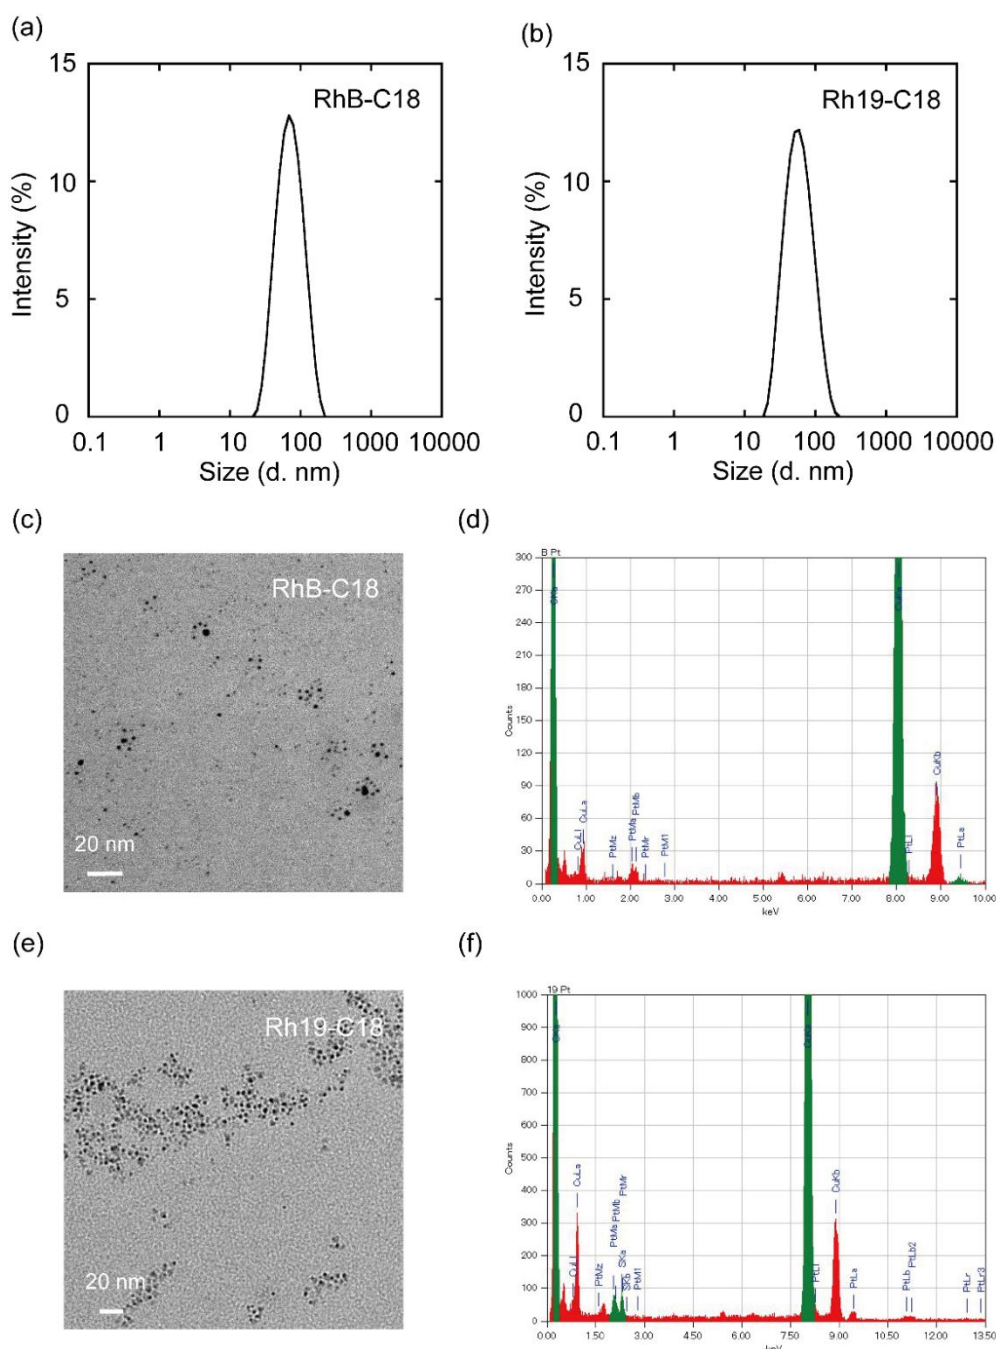

**Figure S14.** (a,b) Size distributions of supramolecular assemblies of (a) **RhB-C18** and (b) **Rh19-C18** determined by DLS under the presence of Asc and  $\text{H}_2\text{PtCl}_6$  (average particle diameter: (a) 52 nm, (b) 64 nm, Polydispersity index (PDI): (a) 0.168, (b) 0.152). (c-f) TEM-EDX (energy dispersive X-ray) analysis of Pt nanoparticles of the mixed solutions. TEM images of Pt nanoparticles in the mixture of Asc,  $\text{H}_2\text{PtCl}_6$ , and (c) **RhB-C18** or (e) **Rh19-C18** after 20 min photoirradiation. (d,f) EDX spectra of selected areas ((d) **RhB-C18**, (f) **Rh19-C18**). Experimental conditions:  $[\text{RhB-C18}] = [\text{Rh19-C18}] = 50 \mu\text{M}$ ,  $[\text{Pt}] = 100 \mu\text{M}$ ,  $[\text{Asc}] = 500 \text{ mM}$ , rt, water., Scale bar: 20 nm, irradiation light wavelength:  $> 360 \text{ nm}$ , 20 min.

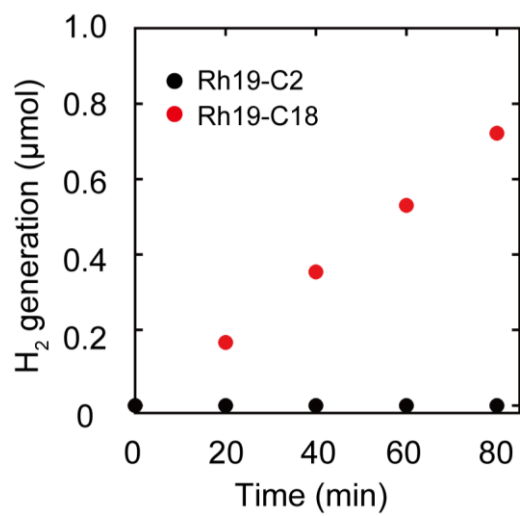

**Figure S15.** Time-course of hydrogen evolution by **Rh19-C2** and **Rh19-C18** under visible light. Experimental conditions: **[Rh19-C2]** = **[Rh19-C2]** = 50 μM, [Pt] = 100 μM, [Asc] = 500 mM, solvent: water, rt, irradiation light wavelength: > 360 nm.

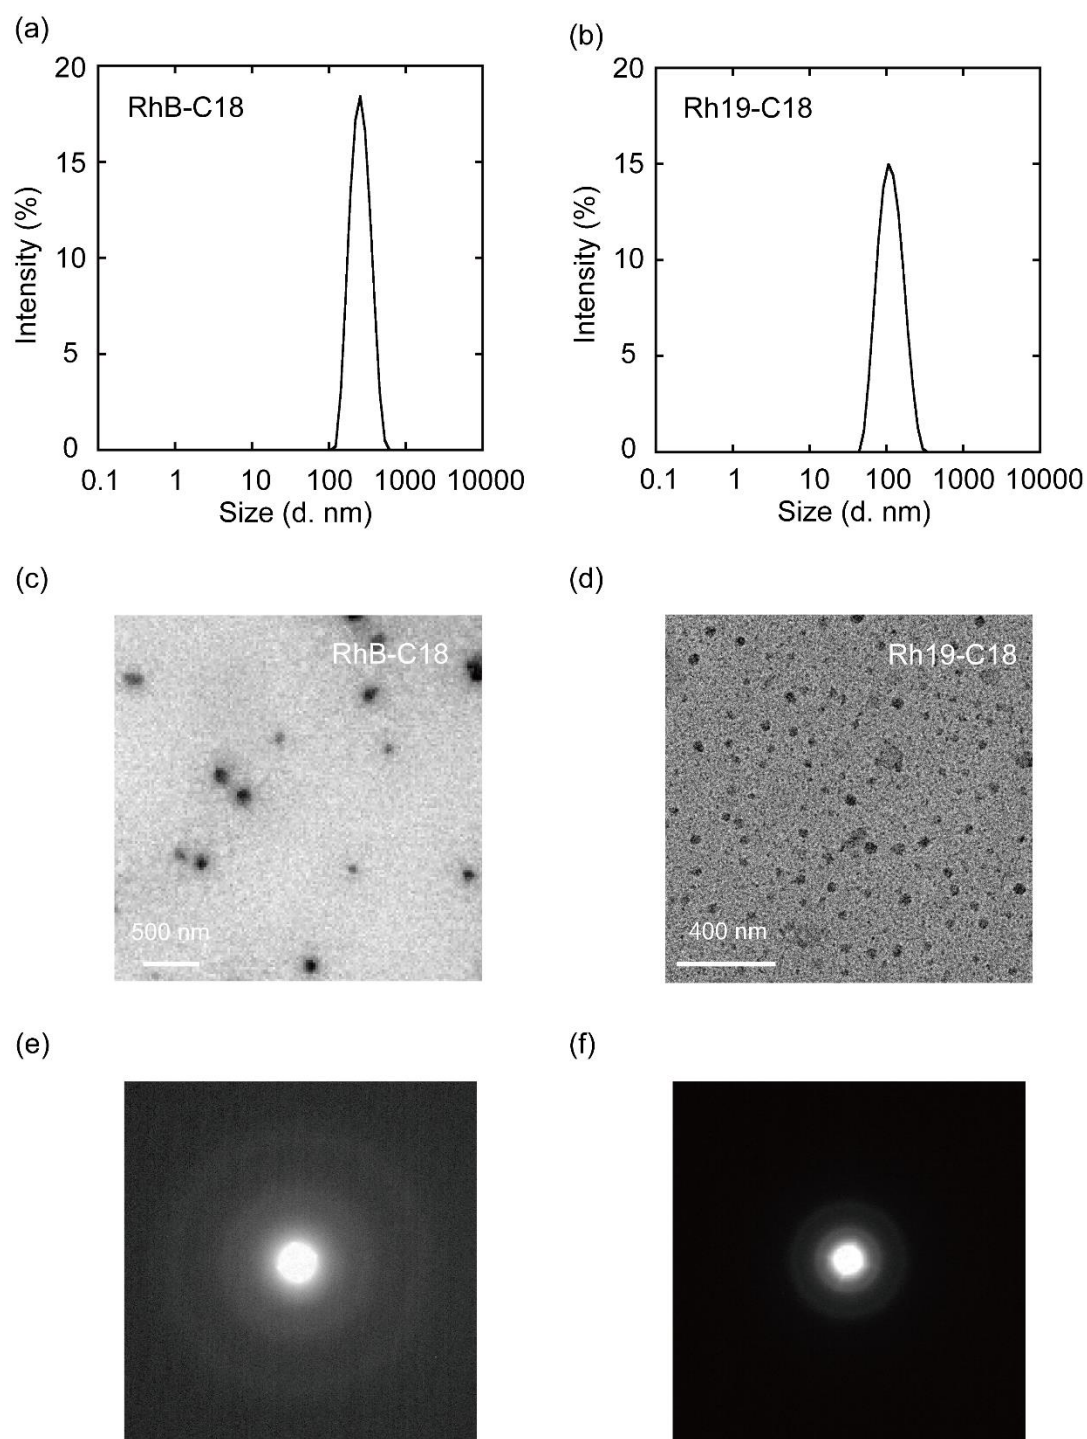

**Figure S16.** (a,b) Size distributions of supramolecular assemblies of (a) **RhB-C18** and (b) **Rh19-C18** determined by DLS (average particle diameter: (a) 223 nm, (b) 122 nm, Polydispersity index (PDI): (a) 0.159, (b) 0.110). (c,d) TEM images of supramolecular assemblies of (c) **RhB-C18** and (d) **Rh19-C18**. Experimental conditions:  $[\text{RhB-C18}] = [\text{Rh19-C18}] = 100 \mu\text{M}$ , rt, water., Scale bar: 500 nm. (e,f) SAED diffraction patterns of supramolecular assemblies of (e) **RhB-C18** and (f) **Rh19-C18**. Experimental conditions:  $[\text{RhB-C18}] = [\text{Rh19-C18}] = 100 \mu\text{M}$ , solvent: water.

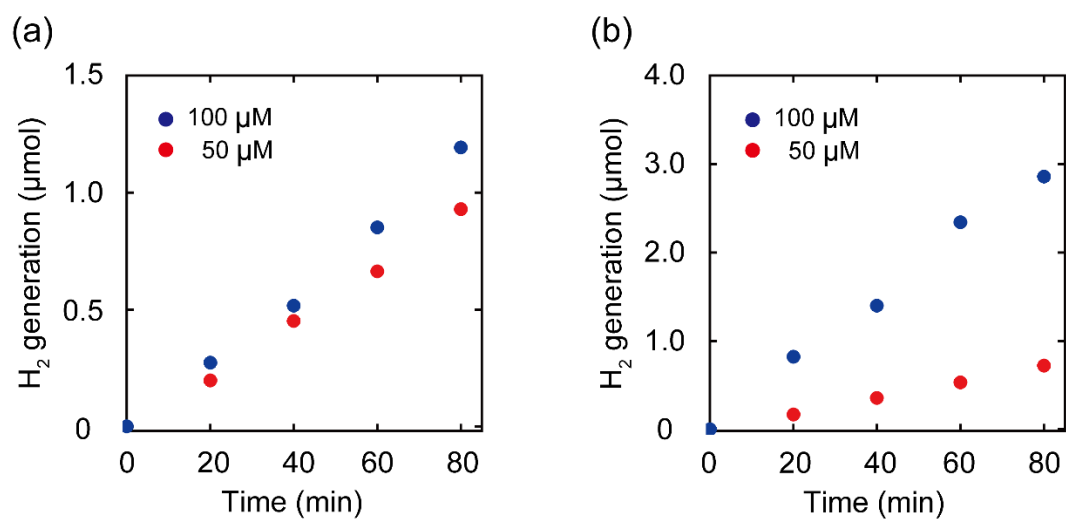

**Figure S17.** Time-course of hydrogen evolution by (a) **RhB-C18** and (b) **Rh19-C18** under various concentrations after irradiation of visible light. Experimental conditions: [Rhodamines] = 50 or 100  $\mu\text{M}$ , [Pt] = 100  $\mu\text{M}$ , [Asc] = 500 mM, solvent: water, rt, irradiation light wavelength: > 360 nm.
